1 **A persistent lack of International representation on editorial boards in biology**

2  
3  
4 Johanna Espin<sup>1,2</sup>, Sebastian Palmas<sup>3</sup>, Farah Carrasco-Rueda<sup>4</sup>, Kristina Riemer<sup>5</sup>, Pablo  
5 E. Allen<sup>6</sup>, Nathan Berkebile<sup>4</sup>, Kirsten A. Hecht<sup>4,7</sup>, Kay Kastner-Wilcox<sup>8</sup>, Mauricio M.  
6 Núñez-Regueiro<sup>5,\*</sup>, Candice Prince<sup>9</sup>, Constanza Rios<sup>4</sup>, Erica Ross<sup>3</sup>, Bhagatveer  
7 Sangha<sup>10</sup>, Tia Tyler<sup>9</sup>, Judit Ungvari-Martin<sup>11,7,\*\*</sup>, Mariana Villegas<sup>5</sup>, Tara T. Cataldo<sup>12</sup>,  
8 and Emilio M. Bruna<sup>2,5\*\*\*</sup>  
9

10  
11 <sup>1</sup> Dept. of Sociology and Criminology & Law, University of Florida, Gainesville, USA

12 <sup>2</sup> Tropical Conservation and Development Program, Center for Latin American Studies,  
13 University of Florida, Gainesville, USA

14 <sup>3</sup> School of Forest Resources and Conservation, University of Florida, Gainesville, USA

15 <sup>4</sup> School of Natural Resources and Environment, University of Florida, Gainesville, USA

16 <sup>5</sup> Dept. of Wildlife Ecology & Conservation, University of Florida, Gainesville, USA

17 <sup>6</sup> Entomology and Nematology Dept., University of Florida, Gainesville, USA

18 <sup>7</sup> Florida Museum of Natural History, University of Florida, Gainesville, USA

19 <sup>8</sup> Soil and Water Sciences Dept., University of Florida, Gainesville, USA

20 <sup>9</sup> Dept. of Environmental Horticulture, University of Florida, Gainesville, USA

21 <sup>10</sup> Horticultural Sciences Dept., University of Florida, Gainesville, USA

22 <sup>11</sup> Dept. of Biology, University of Florida, Gainesville, USA

23 <sup>12</sup> Martson Science Library, University of Florida, Gainesville, USA  
24  
25

26 \*Current Address: Smithsonian Migratory Bird Center, Washington, DC, USA

27 \*\*Current Address: School of Natural Resources & Environment, University of Florida,  
28 Gainesville, USA  
29

30 \*\*\*Corresponding author: [embruna@ufl.edu](mailto:embruna@ufl.edu)

31  
32  
33  
34  
35  
36  
37  
38  
39  
40  
41  
42  
43  
44  
45  
46  
47  
48  
49  
50  
51  
52  
53  
54

## ABSTRACT

The scholars comprising journal editorial boards play a critical role in defining the trajectory of knowledge in their field. Nevertheless, studies of editorial board composition remain rare, especially those focusing on journals publishing research in the increasingly globalized fields of science, technology, engineering, and math (STEM). Using the combined membership of N = 24 editorial boards of environmental biology journals, we tested for changes in the international representation among editors 1985-2014 with metrics used to the diversity of ecological communities. Over the course of these three decades, 3831 unique scientists based in 70 countries served as editors. However, 67.06% of editors were based in the USA and UK, while editors based in the Global South were extremely rare. The number of countries in which editors were based (i.e., Geographic Richness) did increase over the 30-year survey period, but most of these newly represented countries were in Western Europe. As a result, Geographic Diversity remained unchanged from 1985-2014. This – coupled with the 420% increase in the number of editors serving each year – resulted in a significant decline in Geographic Evenness over time. We argue that this limited geographic diversity can detrimentally affect the creativity of scholarship published in journals, the progress and direction of research, the composition of the STEM workforce, and the development of science in the Global South.

**Key words:** bias, editorial board, geographic diversity, peer review, scientific publishing, scientometrics

55

## INTRODUCTION

56

57

58

59

60

61

62

63

64

65

66

67

68

69

70

71

72

73

74

75

76

77

There are currently over 28,000 peer-reviewed academic journals [1], and the scholars who serve on the editorial boards of these journals play a major role in defining the trajectory and boundaries of knowledge in their disciplines [2]. Board members are responsible for coordinating the evaluation by outside experts of a manuscript's technical aspects and the "importance" or "novelty" of the research it summarizes, i.e., peer review, on which the decision to publish a manuscript is ultimately based. Editors play a central but underappreciated role in shaping the community of scholars contributing to the discourse in their field. First, by recommending the publication of an article, the editor confers legitimacy not only on the research, but also upon the individuals who carried it out [3-5]. Second, editors help choose new editors. In doing so, they confer enhanced status and visibility on a select group of scholars, who also benefit from the unique opportunities for professional advancement that board membership provides [6, 7]. Editors are, therefore, a small but powerful group of "Gatekeepers" [2] that select the scientists and ideas shaping the direction of their discipline.

The increased recognition of editor power, along with the results of studies on workforce diversity [8], have heightened concerns about how the composition of editorial boards might influence the peer-review process [9]. For example, it has been suggested that boards whose members are demographically homogenous might converge on a narrow suite of research topics and approaches they consider worthy of publication [3, 4]. This narrow vision – and the board structure driving it – could be perpetuated by editors nominating collaborators, whose perspectives and backgrounds

78 likely match their own, for board service [7]. Indeed, this is among the principal reasons  
79 put forward to explain why women remain severely underrepresented on editorial  
80 boards across academic fields [6], which has consequences for the selection of referees  
81 and other critical aspects of the editorial process [10].

82         Recent decades have seen the rapid globalization of research in science,  
83 technology, engineering, and math (STEM), resulting in greater representation in  
84 international journals of authors based in the Global South, which comprises the world's  
85 'developing' or 'emerging' economies located primarily in Latin America, Asia, Africa,  
86 and the Middle East [11, 12]. Having editorial boards that reflect such "geographic  
87 diversity" is thought to benefit both journals and disciplines in ways that parallel other  
88 forms of diversity. In field-based sciences such as ecology or geology, for example,  
89 editors based in the region where studies are conducted will be more familiar with the  
90 environmental, social, and economic context and constraints under which they were  
91 carried out [13]. This could ensure both more rigorous review and a fairer assessment  
92 of reviewer criticisms and proposed improvements. Furthermore, scientists trained in  
93 different countries can also have very different epistemological orientations. More  
94 nations represented on an editorial board could, therefore, broaden the scope of  
95 theoretical and methodological approaches a journal publishes. Ultimately, these  
96 benefits of internationalizing editorial boards could help to minimize the apparent biases  
97 in the review, publication, and citation of articles based on an author's nationality or  
98 home-country [12, 14].

99         The first systematic efforts to quantify the nationality of STEM editors – often by  
100 using the country in which they were based as a proxy for nationality – were carried out

101 in the early 1980's [15, 16]. Since a small but growing number of studies have observed  
102 patterns similar to what these early ones did – individual editorial boards tend to be  
103 dominated by scholars from the United States of America (USA) and United Kingdom  
104 (UK) [9]. However, prior studies typically compared board composition of journals using  
105 data from only a single calendar year, which makes it impossible to draw conclusions  
106 about the collective of gatekeepers or to understand how this community has changed  
107 over time. Furthermore, most of the journals reviewed are from the physical sciences,  
108 medical fields, or lab-based biological sciences [4, 17]. As a result, almost nothing is  
109 known about geographic diversity of editors in field-based STEM disciplines [18] such  
110 as ecology, evolution, and natural resource management (hereafter “environmental  
111 biology”, EB).

112 We investigated how the geographic composition of the global community of  
113 editors in environmental biology has changed over the last three decades using data on  
114 the 1985-2014 editorial boards of 24 leading journals (Text S1). To do so we used tools  
115 for describing the composition of ecological communities (Text S1), which allow for a  
116 more comprehensive and nuanced description of the editor community. For example, in  
117 addition to quantifying temporal trends in the number of countries in which editors are  
118 based (i.e., Geographic Richness), we also present metrics that consider the total  
119 number of editors based in each country (i.e., Geographic Diversity) and their relative  
120 abundance (i.e., Geographic Evenness). We then calculate the Richness, Diversity, and  
121 Evenness of the editorial community based on the distribution of editors in different  
122 World Bank geographic regions and Gross National Income categories.

123

124 **How geographically diverse is the editorial community?**

125           From 1985-2014, 3831 scientists based in 70 countries served as editors for our  
126 focal journals. At first glance it appears that this community of gatekeepers has become  
127 highly diverse geographically – by 2014 the cumulative number of countries represented  
128 by at least one editor increased 86% ( $N_{1985} = 34$  vs.  $N_{2014} = 70$ ), while the number of  
129 countries represented each year increased 52% ( $N_{1985} = 34$  vs.  $N_{2014} = 52$ ; Fig 1A).  
130 However, scientists based in the USA and UK made up an overwhelming majority of the  
131 editor community (55.29% and 11.77%, respectively; Fig 2A). This concentration of  
132 editors in only two locations is why the Geographic Diversity of the editor community  
133 has remained unchanged since 1985 (Fig 1C, Table S2). Coupled with a 420% increase  
134 in the total number of editors serving each year (Fig 1B), it also explains why  
135 Geographic Evenness decreased significantly from 1985-2014 (Fig 1D, Table S2).

136           These patterns are echoed when assessing representation at regional or  
137 macroeconomic levels. While the proportion of editors that are based in North America  
138 is higher than it was 30 years ago, this is due to the recruitment of proportionately more  
139 editors based in the USA rather than greater representation from Canada or Mexico.  
140 North American editors are often replaced is often by scientists from Europe, with the  
141 remainder typically from Australia, New Zealand, Japan, and other high-income  
142 countries in the East Asia/Pacific region (Fig 2B-C). Consequently, scientists from the  
143 Global South continue to represent only a fraction of editors for the journals we  
144 surveyed (Fig 2B-C). This concentration of editors in the Global North is seen at all  
145 levels of the gatekeeper hierarchy: 94% of Subject and Associate Editors, and a

146 remarkable 98.2% of Editors-in-Chief, are based in high-income countries or Western  
147 Europe (Table 1, Text S1).

148

149 **What does this lack of diversity mean and why does it matter?**

150 We found the lack of scientists from the Global South in the community of  
151 scientific gatekeepers [sensu 18] has persisted despite its tremendous growth and  
152 global expansion. But does this lack of geographic diversity have consequences for the  
153 process of evaluating manuscripts that could ultimately limit the scope and direction of  
154 research in environmental biology? Put bluntly, do editors and reviewers from high-  
155 income regions like the USA or UK have biases – implicit or otherwise – that affect how  
156 they evaluate submissions from scientists based in the Global South? Although one  
157 journal in our survey found no evidence that reviewer or author nationality influenced  
158 the likelihood manuscripts were accepted [19, 20], this contrasts sharply with the results  
159 of prior studies in other STEM fields [21]. There is also compelling evidence that the  
160 country in which an author is based influences where their papers are ultimately  
161 published and how much they are cited [12, 22, 23]. In light of these results, and the  
162 ample data on how gender and ethnic background influence other aspects of academic  
163 evaluation [24], we recommend Editors-in-Chief work to increase the geographic  
164 representation on their boards, make editorial board members and referees aware of  
165 how biases based on author nationality can affect their editorial judgement, and conduct  
166 internal analyses of the potential factors influencing manuscript fate.

167 Internationalizing editorial boards can have positive impacts for journals in  
168 addition to mitigating possible implicit biases. First, scientists who presume their work

169 will not be judged fairly because of their nationality or the country in which they are  
170 based [i.e., the “biased author effect”, 25] may be more likely to submit their  
171 manuscripts to journals that have editors representing their region. This both increases  
172 the number and scope of submissions a journal receives, and the size and expertise of  
173 its reviewer pool. Second, a globally diverse editorial board can serve as an important  
174 signal of journal quality and connote prestige [26], especially to those tasked with  
175 evaluating individual, institutional, or national scientific productivity [17]. Third, it can  
176 enhance the profile and impact of the journal and articles published (to say nothing of  
177 justification for editors to demand more support or resources from their publishers).  
178 Finally, capacity building is often central to the mission of the academic societies. By  
179 providing editorial opportunities to scholars from emerging scientific regions, society  
180 journals can play a pivotal role in achieving this goal.

181         Decades of research have highlighted the positive influence of diversity on  
182 scientific research teams [27]. Although we recognize editorial boards do not operate in  
183 precisely the same way workplace teams do, we believe that geographic diversity can  
184 similarly enhance the creativity and impact of scholarship published in scientific  
185 journals. While we by no means advocate a quota system for countries or regions, we  
186 reiterate prior calls for journal leadership to strive for more geographically diverse  
187 editorial boards [18] whose composition mirrors that of their authors (Fig. S2) and where  
188 they work [13, 28]. These efforts, however, must be guided by specific plans and  
189 timetables to provide both guidance to editors and hold them accountable for their  
190 commitments [29]. Whether such plans underlie the geographic diversity we observed  
191 on a few of the editorial boards we reviewed is unknown (Appendix A). Nevertheless,



192 these examples undermine the frequent argument that it is challenging to find and  
193 recruiting board members from the Global South with the requisite academic  
194 background, editorial experience, and time to serve. We believe that recruiting these  
195 editors is the ethical duty of a journal's leadership, especially given the impact their  
196 presence on the board can have on the global scientific community and the diffusion of  
197 the knowledge they create in the service of society. Where to find them? We humbly  
198 suggest their large and geographically diverse pool of authors is an ideal place to start.

199

200

### **ACKNOWLEDGEMENTS**

201 We thank Juan Pablo Gomez for helpful discussions and assistance with data  
202 collection. This manuscript was completed while EB was Faculty-in-Residence at the  
203 University of Florida Marston Science Library. New data collected for this paper are  
204 available at the Dryad Digital Repository (accession number ---- ----). Code for  
205 reproducing analyses and figures is at -----.

## REFERENCES

1. Ware M, Mabe M. The STM report: An overview of scientific and scholarly journal publishing. 2015. International Association of Scientific Technical and Medical Publishers. The Hague, The Netherlands. 'Available at:' [http://www.stm-  
assoc.org/2015\\_02\\_20\\_STM\\_Report\\_2015.pdf](http://www.stm-<br/>assoc.org/2015_02_20_STM_Report_2015.pdf)
2. Crane D. The gatekeepers of science: Some factors affecting the selection of articles for scientific journals. *The American Sociologist*. 1967;2(4):195-201.
3. Metz I, Harzing A-W. Gender diversity in editorial boards of management journals. *Academy of Management Learning & Education*. 2009;8(4):540-57. doi: 10.5465/AMLE.2009.47785472.
4. Garcia-Carpintero E, Granadino B, Plaza LM. The representation of nationalities on the editorial boards of international journals and the promotion of the scientific output of the same countries. *Scientometrics*. 2010;84(3):799-811. doi: 10.1007/s11192-010-0199-3.
5. Willett P. The characteristics of journal editorial boards in library and information science. *International Journal Of Knowledge Content Development And Technology*. 2013;3(1):5-17. doi: 10.5865/IJKCT.2013.3.1.005.
6. Cho AH, Johnson SA, Schuman CE, Adler JM, Gonzalez O, Graves SJ, et al. Women are underrepresented on the editorial boards of journals in environmental biology and natural resource management. *PeerJ*. 2014;2:e542. doi: 10.7717/peerj.542.
7. Burgess TF, Shaw NE. Editorial board membership of management and business journals: A social network analysis study of the Financial Times 40.

- British Journal of Management. 2010;21(3):627-48. doi: 10.1111/j.1467-8551.2010.00701.x.
8. Cox TH, Blake S. Managing cultural diversity: Implications for organizational competitiveness. *The Executive*. 1991:45-56.
  9. Mazov NA, Gureev VN. The editorial boards of scientific journals as a subject of scientometric research: a literature review. *Scientific and Technical Information Processing*. 2016;43(3):144-53. doi: 10.3103/s0147688216030035.
  10. Fox CW, Burns CS, Meyer JA, Thompson K. Editor and reviewer gender influence the peer review process but not peer review outcomes at an ecology journal. *Functional Ecology*. 2016;30(1):140-53. doi: 10.1111/1365-2435.12529.
  11. Holmgren M, Schnitzer SA. Science on the rise in developing countries. *Plos Biol*. 2004;2(1):e1. doi: 10.1371/journal.pbio.0020001.
  12. Smith MJ, Weinberger C, Bruna EM, Allesina S. The scientific impact of nations: Journal placement and citation performance. *PLoS ONE*. 2014;9(10):e109195. doi: 10.1371/journal.pone.0109195.
  13. Mammides C, Goodale UM, Corlett RT, Chen J, Bawa KS, Hariya H, et al. Increasing geographic diversity in the international conservation literature: A stalled process? *Biological Conservation*. 2016;198:78-83. doi: 10.1016/j.biocon.2016.03.030.
  14. Meneghini R, Packer AL, Nassi-Calo L. Articles by Latin American authors in prestigious journals have fewer citations. *PloS ONE*. 2008;3(11). doi: 10.1371/journal.pone.0003804.

15. Bakker P, Rigter H. Editors of medical journals - who and from where. *Scientometrics*. 1985;7(1-2):11-22. doi: 10.1007/bf02020137.
16. Braun T, Bujdoso E. Gatekeeping patterns in the publication of analytical-chemistry research. *Talanta*. 1983;30(3):161-7. doi: 10.1016/0039-9140(83)80043-5.
17. Nisonger TE. The relationship between international editorial board composition and citation measures in political science, business, and genetics journals. *Scientometrics*. 2002;54(2):257-68. doi: 10.1023/A:1016065929026.
18. Livingston G, Waring B, Pacheco LF, Buchori D, Jiang YX, Gilbert L, et al. Perspectives on the global disparity in ecological science. *Bioscience*. 2016;66(2):147-55. doi: 10.1093/biosci/biv175.
19. Campos-Arceiz A, Primack RB, Koh LP. Reviewer recommendations and editors' decisions for a conservation journal: Is it just a crapshoot? And do Chinese authors get a fair shot? *Biological Conservation*. 2015;186:22-7. doi: 10.1016/j.biocon.2015.02.025.
20. Primack RB, Ellwood E, Miller-Rushing AJ, Marrs R, Mulligan A. Do gender, nationality, or academic age affect review decisions? An analysis of submissions to the journal *Biological Conservation*. *Biological Conservation*. 2009;142(11):2415-8. doi: 10.1016/j.biocon.2009.06.021.
21. Lee CJ, Sugimoto CR, Zhang G, Cronin B. Bias in peer review. *Journal of the American Society for Information Science and Technology*. 2013;64(1):2-17. doi: 10.1002/asi.22784.

22. Mori AS, Qian SH, Tatsumi S. Academic inequality through the lens of community ecology: a meta-analysis. *PeerJ*. 2015;3(3):e1457. doi: 10.7717/peerj.1457.
23. Meijaard E, Cardillo M, Meijaard EM, Possingham HP. Geographic bias in citation rates of conservation research. *Conserv Biol*. 2015;29(3):920-5. doi: 10.1111/cobi.12489.
24. Menges RJ, Exum WH. Barriers to the progress of women and minority faculty. *The Journal of Higher Education*. 1983;54(2):123-44. doi: 10.1080/00221546.1983.11778167.
25. Akre O, Barone-Adesi F, Pettersson A, Pearce N, Merletti F, Richiardi L. Differences in citation rates by country of origin for papers published in top-ranked medical journals: do they reflect inequalities in access to publication? *J Epidemiol Commun H*. 2011;65(2):119-23. doi: 10.1136/jech.2009.088690.
26. Pearson C, Mullen R, Thomason W, Phillips S. Associate editor's role in helping authors and upholding journal standards. *Agronomy Journal*. 2006;98(3):417-22. doi: 10.2134/agronj2005.0296.
27. Liao C. How to improve research quality? Examining the impacts of collaboration intensity and member diversity in collaboration networks. *Scientometrics*. 2011;86(3):747-61. doi: 10.1007/s11192-010-0309-2.
28. Stocks G, Seales L, Paniagua F, Maehr E, Bruna EM. The geographical and institutional distribution of ecological research in the tropics. *Biotropica*. 2008;40(4):397-404. doi: 10.1111/j.1744-7429.2007.00393.x.

29. Calver M, Wardell-Johnson G, Bradley S, Taplin R. What makes a journal international? A case study using conservation biology journals. *Scientometrics*. 2010;85(2):387-400. doi: 10.1007/s11192-010-0273-x.

**Table 1:** Percentage of the editorial board members from N = 24 environmental biology journals based in different (A) World Bank Country Income Categories and (B) Global Regions. Between 1985-2014 there were N = 3831 unique editors from 70 countries. The total number of editors in each region and national income category differs due to some editors having moved between 1984-2015; similarly, one person may serve multiple editorial roles. Numbers in parentheses are the number of unique editors in each category. Abbreviations: EIC: Editor-in-Chief, AE: Associate Editor, SE: Subject Editor, SpE: Special Category Editor.

| <b>(A) World Bank National Income Category</b> | <b>Total No. of Editors</b> | <b>% of EIC<br/>(N = 171)</b> | <b>% of AE<br/>(N = 247)</b> | <b>% of SE<br/>(N = 3690)</b> | <b>% of SpE<br/>(N= 80)</b>  |
|------------------------------------------------|-----------------------------|-------------------------------|------------------------------|-------------------------------|------------------------------|
| High income OECD                               | 3608                        | 97.66                         | 92.71                        | 93.36                         | 97.50                        |
| High income Non-OECD                           | 51                          | 0.58                          | 1.62                         | 1.33                          | 1.25                         |
| Upper-middle income                            | 152                         | 1.75                          | 4.45                         | 4.01                          | 1.25                         |
| Lower-middle income                            | 44                          | 0.0                           | 1.21                         | 1.17                          | 0                            |
| Low income                                     | 5                           | 0.0                           | 0.0                          | 0.14                          | 0                            |
|                                                | Total = 3860                |                               |                              |                               |                              |
| <b>(B) Global Region</b>                       | <b>Total No. of Editors</b> | <b>% of EIC<br/>(N = 171)</b> | <b>% of AE<br/>(N = 251)</b> | <b>% of SE<br/>(N = 3729)</b> | <b>% of SpE<br/>(N = 82)</b> |
| North America                                  | 2376                        | 50.29                         | 49.00                        | 61.22                         | 67.07                        |
| Europe & Central Asia                          | 1025                        | 45.03                         | 35.86                        | 25.69                         | 23.17                        |
| East Asia & Pacific                            | 312                         | 2.34                          | 8.76                         | 7.91                          | 7.32                         |
| Latin America & Caribbean                      | 108                         | 0.58                          | 4.38                         | 2.82                          | 1.22                         |
| Sub-Saharan Africa                             | 50                          | 1.75                          | 1.59                         | 1.26                          | 1.22                         |
| South Asia                                     | 24                          | 0.0                           | 0.40                         | 0.62                          | 0                            |
| Middle East & North Africa                     | 18                          | 0.0                           | 0.00                         | 0.48                          | 0                            |
|                                                | Total = 3911                |                               |                              |                               |                              |

## FIGURE LEGENDS

### **Fig 1. Community composition of editors in environmental biology (1985-2014).**

(A) Geographic Richness: Cumulative Richness is the total number of countries represented by at least one editor through each calendar year; Annual Richness is the number of countries represented by editors in each calendar year (B) The total number of unique editors serving each calendar year from 1984-2015 (C) Geographic Diversity: larger values indicate greater diversity, with the maximum possible value ( $N = 52$ ) equal to the greatest number of unique countries represented in one year during our survey period (D) Geographic Evenness: values range from 0-1, with 1 indicating editors are equally distributed among all countries represented in that year.

### **Fig 2. The percentage of environmental biology editors based in different countries, global regions, and World Bank national income categories.**

(A) Countries; Abbreviations: USA: United States of America, GBR: United Kingdom, CAN: Canada, AUS: Australia, NLD: Netherlands, FRA: France, SWE: Sweden, CHE: Switzerland. (B) World Bank global regions (C) World Bank Gross National Income categories.



(A) Geographic Richness

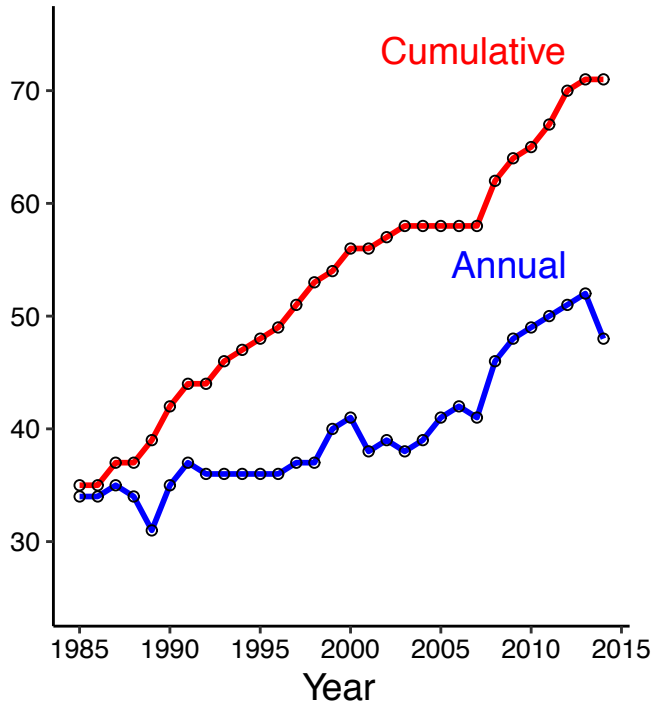

(B) Number of Editors

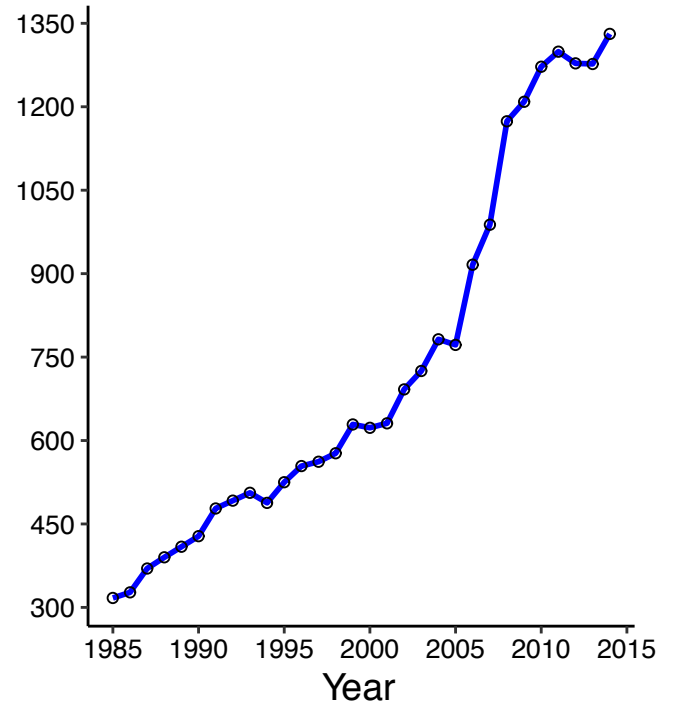

(C) Geographic Diversity

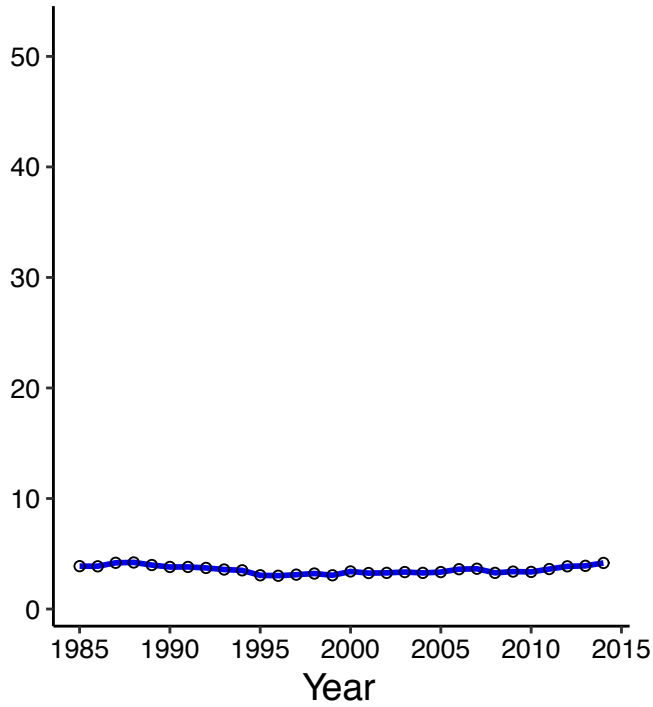

(D) Geographic Evenness

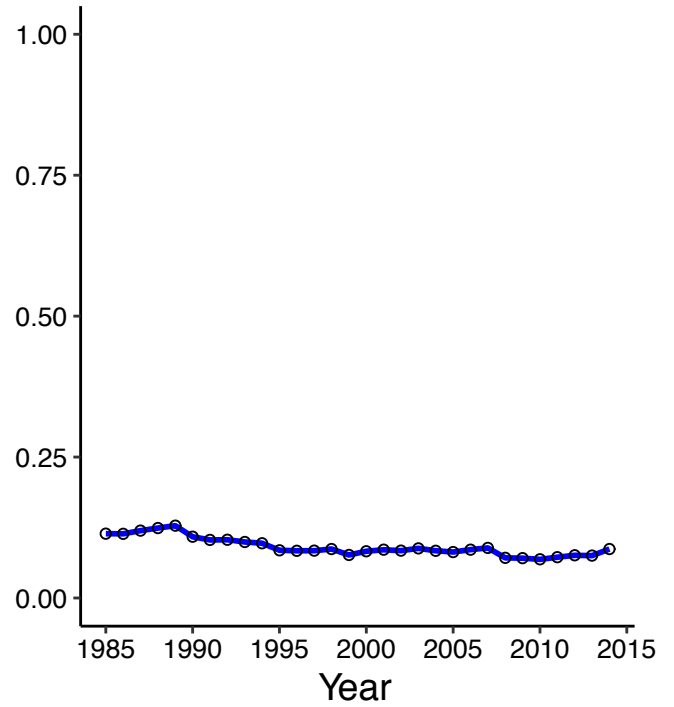

(A) Editor Home Country

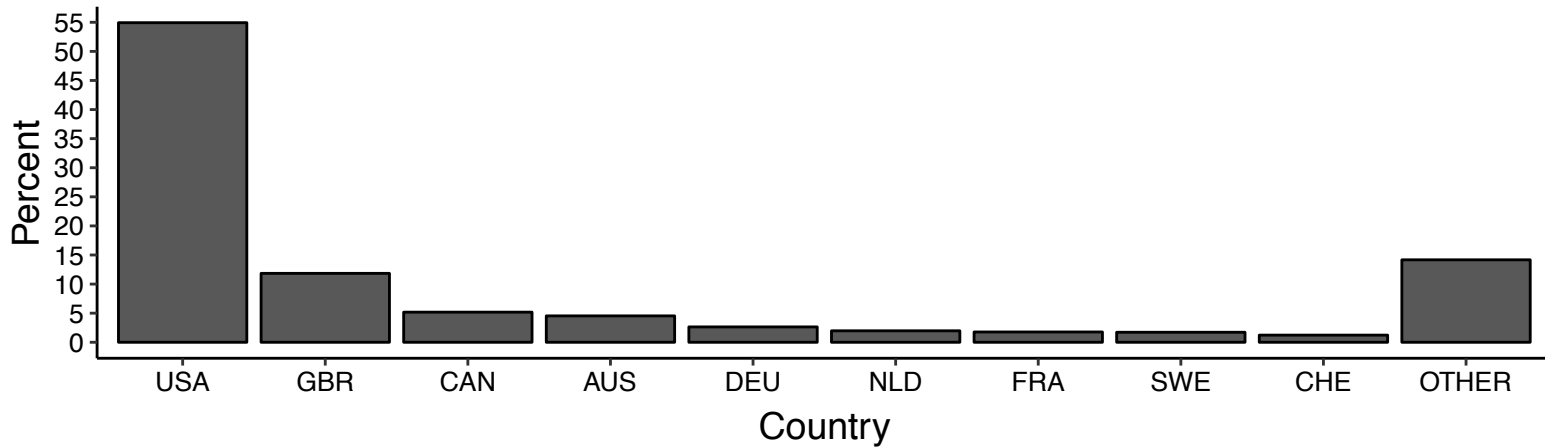

(B) Editor Region

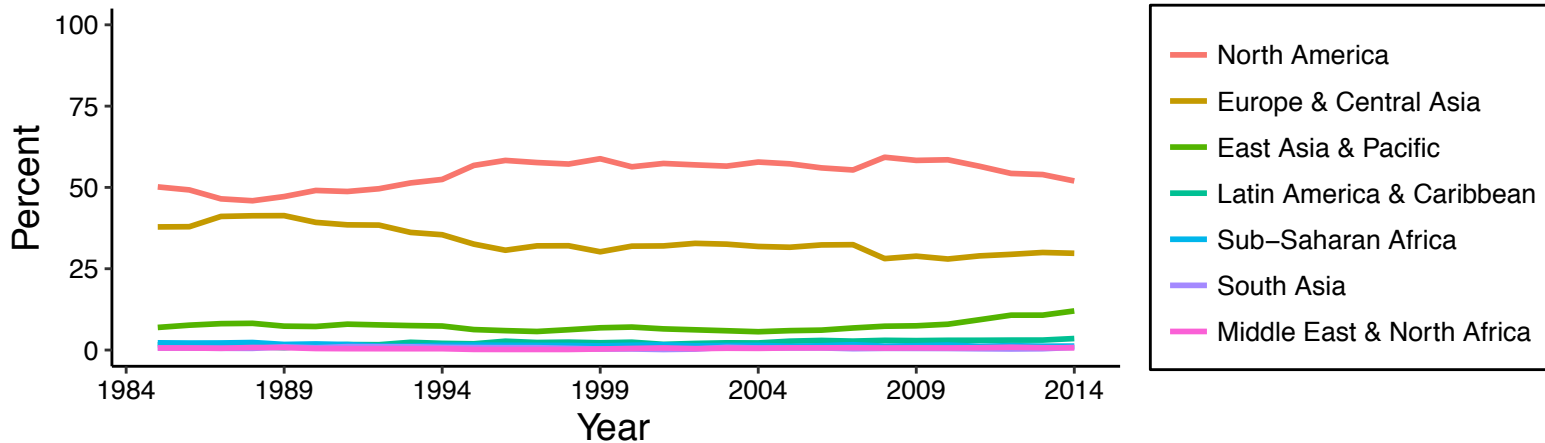

(C) Editor National Income Category

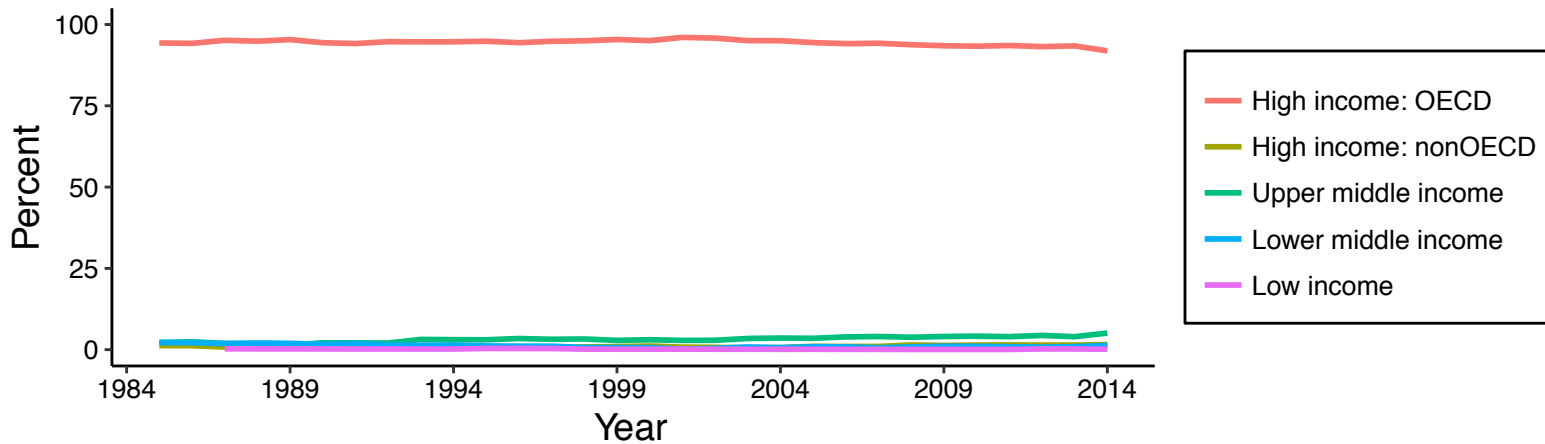

1 **Supporting information for:**

2 **A persistent lack of International representation on editorial boards in biology**

3 Johanna Espin<sup>1,2</sup>, Sebastian Palmas<sup>3</sup>, Farah Carrasco-Rueda<sup>4</sup>, Kristina Riemer<sup>5</sup>, Pablo  
4 E. Allen<sup>6</sup>, Nathan Berkebile<sup>4</sup>, Kirsten A. Hecht<sup>4,7</sup>, Kay Kastner-Wilcox<sup>8</sup>, Mauricio M.  
5 Núñez-Regueiro<sup>5,\*</sup>, Candice Prince<sup>9</sup>, Constanza Rios<sup>4</sup>, Erica Ross<sup>3</sup>, Bhagatveer  
6 Sangha<sup>10</sup>, Tia Tyler<sup>9</sup>, Judit Ungvari-Martin<sup>11,7,\*\*</sup>, Mariana Villegas<sup>5</sup>, Tara T. Cataldo<sup>12</sup>,  
7 and Emilio M. Bruna<sup>2,5\*\*\*</sup>

8  
9 <sup>1</sup> Dept. of Sociology and Criminology & Law, University of Florida, Gainesville, USA

10 <sup>2</sup> Tropical Conservation and Development Program, Center for Latin American Studies,  
11 University of Florida, Gainesville, USA

12 <sup>3</sup> School of Forest Resources and Conservation, University of Florida, Gainesville, USA

13 <sup>4</sup> School of Natural Resources and Environment, University of Florida, Gainesville, USA

14 <sup>5</sup> Dept. of Wildlife Ecology & Conservation, University of Florida, Gainesville, USA

15 <sup>6</sup> Entomology and Nematology Dept., University of Florida, Gainesville, USA

16 <sup>7</sup> Florida Museum of Natural History, University of Florida, Gainesville, USA

17 <sup>8</sup> Soil and Water Sciences Dept., University of Florida, Gainesville, USA

18 <sup>9</sup> Dept. of Environmental Horticulture, University of Florida, Gainesville, USA

19 <sup>10</sup> Horticultural Sciences Dept., University of Florida, Gainesville, USA

20 <sup>11</sup> Dept. of Biology, University of Florida, Gainesville, USA

21 <sup>12</sup> Martson Science Library, University of Florida, Gainesville, USA

22

23 \*\*\*Corresponding author: Phone: (352) 846-0634, email: [embruna@ufl.edu](mailto:embruna@ufl.edu)

|    |                                               |
|----|-----------------------------------------------|
| 24 | <b>CONTENTS</b>                               |
| 25 |                                               |
| 26 | 1. Methods                                    |
| 27 | a. Data Collection: Editors                   |
| 28 | b. Data Collection: Authors                   |
| 29 | c. Analyses: Overview                         |
| 30 | d. Analyses: Metrics of community composition |
| 31 | e. Analyses: Statistics                       |
| 32 | 2. Results                                    |
| 33 | 3. Table A                                    |
| 34 | <b>4. Figure A</b>                            |

## 35 1. METHODS

### 36 1a. Data collection: Editors

37 Our analyses are based on the 1985-2014 editorial boards of 24 journals (Table  
38 S1). We selected these journals because they are considered high-profile and  
39 prestigious outlets in which to publish research from a range of environmental and  
40 natural resource disciplines. Whenever possible we selected journals published by  
41 academic societies with global membership and comparable publisher-owned outlets for  
42 similar research (e.g., *Biotropica* and *Journal of Tropical Ecology*, *Conservation Biology*  
43 and *Biological Conservation*). We chose 1985 as a starting point because we wanted to  
44 determine if there had been changes in the composition of editorial boards of high-  
45 profile disciplinary journals after the emergence of new centers of scientific productivity  
46 in Latin America and Asia [1, 2]. This meant excluding several high-profile journals  
47 because they only began publishing in the past decade (e.g., *Ecology Letters*, *Molecular*  
48 *Ecology*). We did, however, include three journals that were first published in 1987:  
49 *Conservation Biology*, *Functional Ecology*, and *Landscape Ecology* (Table S1).

50 Using the first issue of the journal published in each calendar year, we recorded  
51 the names of all editorial board members, their editorial positions, their institutions  
52 (when given), and the country in which they were based. The 1985-2013 data from 10  
53 of these journals were collected by Cho et al. [3] and archived at the Dryad Digital  
54 Repository [4].

55 Journals often have different titles for positions with similar responsibilities, these  
56 titles can change over time, and new positions are frequently created or eliminated. We  
57 therefore used the same definitions as Cho et al. [3] to assign editorial board members

58 to one of four categories based on their primary responsibilities. These categories were:

- 59 1) **Editor-in-Chief (EIC)**. The EIC oversees the journal and is ultimately  
60 responsible for editorial policy, standards, and practices, including nominating  
61 or appointing new Editorial board members. Some journals have co-Editors-in-  
62 Chief (e.g., *North American Journal of Fisheries Management*, *Oecologia*).
- 63 2) **Associate Editors (AE)**. AEs assist the EIC with their responsibilities and often  
64 take the lead on some aspects of journal administration. Some AEs oversee all  
65 submissions in a specific subject area or about a geographic region. Not all  
66 journals have AEs, and some had AEs for only a subset of the survey period.
- 67 3) **Subject Editors (SE)**. SEs oversee manuscript review. SEs for some journals  
68 make final decisions on manuscripts after receiving reviewer feedback (e.g.,  
69 *Ecology*) while SEs for other journals provide recommendations upon which  
70 a senior editor (i.e., EIC, AE) makes the final decision (e.g., *Biotropica*, *J.*  
71 *Ecology*). They also provide feedback on journal policy and administration. SEs  
72 are sometimes referred to by other names, including Handling Editors, the  
73 Board of Editors (e.g., *Ecology*, *Biological Conservation*) and the Editorial  
74 Committee (e.g., *Annual Review of Ecology, Evolution, and Systematic*,  
75 *American Journal of Botany*). In addition, two journals used the title of  
76 “Associate Editor” for Board members with SE responsibilities (i.e., *American*  
77 *Journal of Botany*, *North American Journal of Fisheries Management*); they  
78 were considered SEs in our analyses.
- 79 4) **Special Editors (SpE)**: Special Editors include editors tasked with soliciting  
80 papers for special article categories, organizing special sections or volumes,

81 reviewing data archives or computer code, or coordinating reviews of recently  
82 published books. Examples of special Editors include those responsible for the  
83 “Biological Flora” section of the *Journal of Ecology*, editors for *Ecology’s*  
84 “Concept Section”, “Data Archive”, “Special Features”, and “Invited Papers”, the  
85 Editors of “Natural History Miscellany” for the *American Naturalist*, and  
86 “Commentary” Editors for *Biotropica*. For many journals the Special Editors also  
87 serve as the Subject Editors of “standard” manuscript submissions.

88 We standardized the countries in which editor institutions were based by  
89 converting them to their respective ISO 3166-1 alpha-3 codes (ISO 2016). Note that as  
90 per [5] we count editors based in territories or overseas departments separately from  
91 those in the sovereign state (e.g., Editors based in Puerto Rico or French Guiana are  
92 counted separately from those in, respectively, the USA and France). In cases where  
93 the name of the country changed between 1985 and 2014 we used for analyses the  
94 contemporary name for the country where the editor’s home institution was based (e.g.,  
95 an editor based in before 1993 would be assigned to Bosnia and Herzegovina, Croatia,  
96 Macedonia, Montenegro, Serbia, or Slovenia as appropriate).

97 We also assigned the country in which each editor was based to its World Bank  
98 Global Region and National Income category [6]. The geographic regions are: (1)  
99 Europe/Central Asia (2) East Asia/Pacific, (3) Latin America/Caribbean, (4) Sub-  
100 Saharan Africa, (5) South Asia, (6) Middle East/North Africa, (7) North America (i.e.,  
101 Canada and the United States). The National Income categories are: (1) high-income  
102 Organization for Economic Cooperation and Development (OECD) member (*per capita*  
103 GNI  $\geq$  \$12476), (2) high-income non-OECD member (*per capita* GNI  $\geq$  \$12476) (3)

104 upper-middle income (*per capita* GNI \$4036-\$12475), (4) lower-middle income (*per*  
105 *capita* GNI \$1026-\$4035), (5) low-income (*per capita* GNI  $\leq$  \$1025) [6].

106 Finally, we note that throughout the text we use the terms “Global North” and  
107 “Global South”. The term Global North refers to the group of economically developed  
108 countries with high per capita Gross Domestic Product (GDP) that collectively  
109 concentrate most global wealth. Because national development is a product of cultural  
110 and political history, not all countries in this classification are in the Northern  
111 Hemisphere (e.g., Australia, New Zealand). The “Global South” comprises the world’s  
112 ‘developing’ or ‘emerging’ economies, most of which are in Latin America, Asia, Africa,  
113 and the Middle East [7].

114

#### 115 **1b. Data collection: Authors**

116 We also collected data on the country in which authors of all papers published in  
117 our focal journals from 1985-2014 were based. For each year *X* we did a Thomson-  
118 Reuters Web of Science (WOS) search with the following search string:

119 *SO=(Agronomy Journal OR American Journal of Botany OR Journal of Applied*  
120 *Ecology OR American Naturalist OR Journal of Biogeography OR Annual Review*  
121 *of Ecology\*, OR Journal of Ecology OR Biological Conservation OR Journal of*  
122 *Tropical Ecology OR Biotropica OR Journal of Zoology OR Conservation Biology*  
123 *OR Landscape Ecology OR Ecography OR Holarctic Ecology OR Ecology OR*  
124 *New Phytologist OR Evolution OR North American Journal of Fisheries*  
125 *Management OR Forest Ecology and Management OR Oecologia OR Functional*



126 *Ecology OR Oikos OR Journal of Animal Ecology OR Plant Ecology OR*  
127 *Vegetatio) AND PY=(X)*

128 We then downloaded the WOS-generated frequency table reporting the countries in  
129 which the authors of the articles published in year  $X$  were based and standardized the  
130 author nationalities using same methods we did for editors. It is important to note that  
131 these frequency tables do not provide the total number of authors from each country,  
132 only how many times a country was represented in a set of articles. Consequently, the  
133 data can be used for analyses of Author Geographic Richness but not to calculate  
134 frequency based metrics such as Diversity and Evenness. Furthermore, all author  
135 institutional addresses are counted towards the national totals, e.g., a paper with an  
136 author listing a primary address is in the USA and a secondary address is in Panama  
137 results in both Panama and the USA being “credited” for that author; which could result  
138 in an overestimate of the total number of countries represented by authors.

139

#### 140 **1c. Analyses: Overview**

141 Because our primary goal was to assess the geographic diversity of the  
142 community of scientists serving as editors – rather than quantify and compare journal-  
143 level metrics – we pooled the data from the  $N=24$  journals for our analyses and  
144 assigned each editor a unique ID number. Editors serving on multiple boards in the  
145 same year were only counted once. We conducted our analyses using all four editor  
146 categories – EIC, AE, SE, and SpE – and use the term ‘editorial board’ to refer to the  
147 collection of scientists comprising all four categories. As per Cho et al. [3] we did not  
148 include advisors without editorial responsibilities, such as the *American Journal of*

149 *Botany's* “Section Representatives” or the “Publication Board” for *Oikos*, nor the staff  
150 primarily responsible for the administrative aspects of journal publishing (e.g.,  
151 production editors, managing editors, editorial assistants, etc.).

152

#### 153 **1d. Analyses: Metrics of community composition**

154 While “diversity” is often used colloquially to mean “the representation of different  
155 groups in a focal population or workplace”, ecologists define the “diversity” of a site  
156 quantitatively using a combination of how many species are found in a site (i.e.,  
157 “species richness”) and the local abundance of each species. These data are also used  
158 to calculate “evenness”, which is an index of species’ relative abundance (e.g., the  
159 evenness of a site with 20 species is far greater if all species are similarly abundant  
160 than if the 1-2 are very common while the remainder are found at low abundance) [8].

161 We used this approach to describe the editorial community and how it changed  
162 over time. For each year of our survey we calculated the editorial community’s  
163 Geographic Richness (GR, i.e., the number of countries represented), Geographic  
164 Diversity (GD, i.e., the combination of geographic richness and abundance of editors  
165 from different countries) and “Geographic Evenness” (GE, i.e., the relative  
166 representation of different countries in the editorial community). To calculate the  
167 geographic diversity of editors in each year from  $t_{\text{initial}}$  to  $t_{\text{final}}$  we used Simpson’s  
168 Dominance Index,  $D_2$ :

169 
$$D_2 = \frac{1}{\sum_{i=1}^R p_i^2}$$

170 where  $R$  is the greatest value of geographic richness recorded in any year between  $t_{\text{initial}}$   
171 and  $t_{\text{final}}$  and  $p_i$  is the proportional abundance of the  $i$ th country in year  $t$ .  $D_2$  is also

172 known as the Inverse or Reciprocal Simpson's Index, and we chose to use it as our  
173 measurement of diversity for two reasons [8]. First, it is simpler to interpret than other  
174 common diversity indices: larger values indicate greater diversity, with the maximum  
175 potential diversity equal to the greatest number of countries represented in any one year  
176 of the sample period. Second, it allows for the mathematical independence of Diversity  
177 and Evenness, such that Evenness can be calculated using  $D_2$  and  $R$  as follows:

$$178 \quad E = \frac{D_2}{R}$$

179 Evenness ranges from 0-1, with 1 being a completely even distribution (i.e., when  $E = 1$   
180 editors are equally distributed among all countries observed during the survey period).  
181 Note that the independence of diversity and evenness means that a community can  
182 have low diversity but high evenness.

183

#### 184 **1d. Analyses: statistics**

185 All data were organized, analyzed, and visualized using the `tidyr`, `dplyr`, and  
186 `ggplot2` libraries [9] for the R statistical programming language [10]. To determine if  
187 there were temporal trends in the composition of the editorial community, we first  
188 calculated the Geographic Richness, Diversity, and Evenness of each year's community  
189 of editors using the `vegan` library [11]. We then tested for changes in these three  
190 metrics over time with linear models, fit with Generalized Linear Squares (GLS). We  
191 used this approach because it allows testing for and removing the effects of potential  
192 temporal autocorrelation resulting from editors serving terms of multiple, consecutive  
193 years.

194 We constructed models in which the dependent variable was the value of each  
195 metric in each year, Year and the Number of Editors in a year were included as factors  
196 (independently and in combination). Preliminary analyses indicated that there was  
197 autocorrelation in all response variables, so we included it in all models as an auto-  
198 regressive moving average (ARMA) process with  $p = 1$  and  $q = 0$ . We then used Akaike  
199 Information Criteria corrected for smaller sample sizes (i.e., AICc) to identify the model  
200 whose combination of main effects and interactions provided best fit the data. A  
201 significant effect of Year, either alone or in combination with Editor Number, would  
202 indicate a change over time in Richness, Diversity, and Evenness. These analyses were  
203 carried out using the libraries `nlme` [12] and `MuMIn` [13].

204 Finally, we used  $\chi^2$  tests to compare the number of unique editors (all years  
205 combined) based in each World Bank global region and national income category.  
206

## 207 **2. RESULTS**

208 We identified  $N = 3829$  scientists from  $N = 71$  countries that served as editors for  
209 our focal journals from 1985 to 2014. Over the course of our survey period the size of  
210 the editor community serving each year increased almost 420% ( $N=316$  in 1985 vs.  
211  $N=1340$  in 2014). The number of countries represented per year increased from  $N=34$   
212 in 1985 to  $N=49$  in 2015.

213 After accounting for autocorrelation, the increase in Geographic Richness over  
214 time was best explained by the number of editors (Table A in S1 Text, Fig A in S1 Text).  
215 In contrast, the best fit for the data on Geographic Diversity was the model that included  
216 only the intercept, indicating no increase in diversity over the course of our survey

217 period or as might be expected from the increasing number of editors (Table A in S1  
218 Text). In contrast, the models that best fit the data on Geographic Evenness included  
219 Year as a main effect. Even after removing the effect of temporal autocorrelation,  
220 evenness declined over our survey period – despite starting at an already low value  
221 ( $\text{Evenness}_{1984} = 0.11$ ) – due to a significant effect of editor number (Table A in S1 Text).  
222 Finally, there was a significant difference in the frequency of editors representing  
223 different national income categories ( $\chi^2 = 13038$ ,  $df = 4$ ,  $p < 0.0001$ ) and geographic  
224 regions ( $\chi^2 = 8263$ ,  $df = 6$ ,  $p < 0.0001$ ). Editors were overwhelmingly from High-income  
225 OECD countries or North America and Europe/Central Asia (Fig 2).

226 From 1985-2014 there were 113,816 articles (including editorials, notes, etc.)  
227 published in our focal journals. In 1985, the authors of articles in our focal journals were  
228 based in 65 countries. By 2014 authors from  $N = 189$  countries had published in the 24  
229 journals (Fig. S2).

**TABLE A.** Model selection for the effect of Year (model 2), the Total Number of Editors (model 3), both Year and Total Number of Editors (model 4), and Year, Editor Number, and their Interaction (Model 5) on three metrics of editor community composition fit to 30 observations (i.e., total degrees of freedom). All models included an ARMA(1) autocorrelation term. The best-fit model is indicated in bold.

### Geographic Richness

| <u>Model</u>            | <u>dAIC</u> | <u>df</u> | <u>weight</u> |
|-------------------------|-------------|-----------|---------------|
| 1 Intercept             | 17.44       | 3         | 0             |
| 2 Year                  | 11.34       | 4         | 0.003         |
| <b>3 No. of Editors</b> | <b>0</b>    | <b>4</b>  | <b>0.75</b>   |
| 4 Year + No. of Editors | 2.76        | 5         | 0.19          |
| 5 Year * No. of Editors | 5.29        | 6         | 0.05          |

### Geographic Diversity

| <u>Model</u>            | <u>dAIC</u> | <u>df</u> | <u>weight</u> |
|-------------------------|-------------|-----------|---------------|
| <b>1 Intercept</b>      | <b>0</b>    | <b>3</b>  | <b>0.45</b>   |
| 2 Year                  | 2.66        | 4         | 0.12          |
| 3 No. of Editors        | 2.65        | 4         | 0.12          |
| 4 Year + No. of Editors | 5.17        | 5         | 0.03          |
| 5 Year * No. of Editors | 0.93        | 6         | 0.28          |

### Geographic Evenness

| <u>Model</u>                   | <u>dAIC</u> | <u>df</u> | <u>weight</u> |
|--------------------------------|-------------|-----------|---------------|
| 1 Intercept                    | 2.59        | 3         | 0.08          |
| 2 Year                         | 0.4         | 4         | 0.30          |
| 3 No. of Editors               | 0.1         | 4         | 0.29          |
| 4 Year + No. of Editors        | 2.87        | 5         | 0.07          |
| <b>5 Year * No. of Editors</b> | <b>0</b>    | <b>6</b>  | <b>0.30</b>   |

**Fig. A.** Relationship between Geographic Richness and the size of the Editor community (1995-2014, pooled data from N=24 journals).

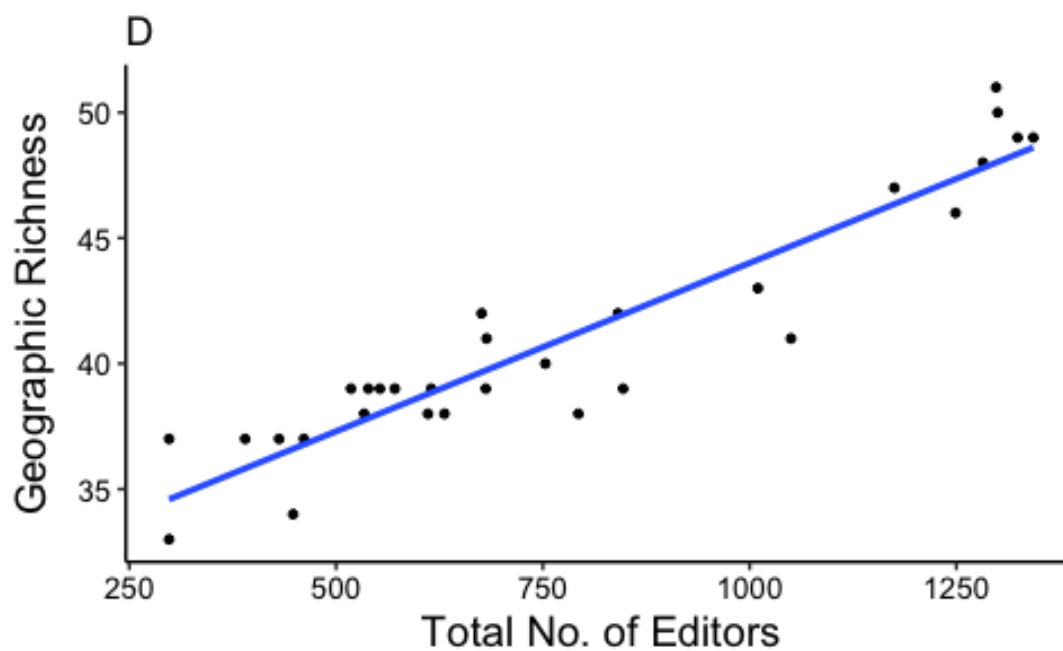

## REFERENCES

1. Holmgren M, Schnitzer SA. Science on the rise in developing countries. *Plos Biol.* 2004;2(1):e1. doi: 10.1371/journal.pbio.0020001.
2. Smith MJ, Weinberger C, Bruna EM, Allesina S. The scientific impact of nations: Journal placement and citation performance. *PLoS ONE.* 2014;9(10):e109195. doi: 10.1371/journal.pone.0109195.
3. Cho AH, Johnson SA, Schuman CE, Adler JM, Gonzalez O, Graves SJ, et al. Women are underrepresented on the editorial boards of journals in environmental biology and natural resource management. *PeerJ.* 2014;2:e542. doi: 10.7717/peerj.542.
4. Cho AH, Johnson SA, Schuman CE, Adler JM, Gonzalez O, Graves SJ, et al. Data from "Women are underrepresented on the editorial boards of journals in environmental biology and natural resource management (PeerJ)". 2014; Database: Dryad Digital Repository. Available from: <http://doi.org/10.5061/dryad.6jn86>.
5. Stocks G, Seales L, Paniagua F, Maehr E, Bruna EM. The geographical and institutional distribution of ecological research in the tropics. *Biotropica.* 2008;40(4):397-404. doi: 10.1111/j.1744-7429.2007.00393.x.
6. The World Bank. World Bank Country and Lending Groups. 2017. Available from: <https://datahelpdesk.worldbank.org/knowledgebase/articles/906519-world-bank-country-and-lending-groups>.



7. Independent Commission on International Development Issues. North-South: a programme for survival: report of the Independent Commission on International Development Issues. Cambridge, MA: MIT Press; 1980.
8. Morris EK, Caruso T, Buscot F, Fischer M, Hancock C, Maier TS, et al. Choosing and using diversity indices: insights for ecological applications from the German Biodiversity Exploratories. *Ecol Evol.* 2014;4(18):3514-24. doi: 10.1002/ece3.1155.
9. Wickham H, Grolemund G. R for data science. Sebastopol, CA: O'Reilly; 2016.
10. R Core Team. R: A language and environment for statistical computing. 2016; R Foundation for Statistical Computing, Vienna, Austria. Available from: <https://www.r-project.org/>
11. Oksanen J, Blanchet FG, Friendly M, Kindt R, Legendre P, McGlenn D, et al. vegan: Community Ecology Package. R package version 2.4-2. 2017; <https://cran.r-project.org/package=vegan>
12. Pinheiro J, Bates D, DebRoy S, Sarkar D, R Core Team. nlme: Linear and Nonlinear Mixed Effects Models. R package version 3.1-128. 2016; <https://cran.r-project.org/package=nlme>.
13. Bartoń K. MuMIn: Multi-Model Inference. R package version 1.15.6. 2016; <https://cran.r-project.org/package=MuMIn>

**Table S1.** Data on the N=24 environmental biology journals used in our survey of editorial board geography.

| Journal                                                                        | Editors<br>1985 | Countries<br>1985 | Editors<br>2014 | Countries<br>2014 | Total Editors<br>1985-2014 | Total Countries<br>1985-2014 |
|--------------------------------------------------------------------------------|-----------------|-------------------|-----------------|-------------------|----------------------------|------------------------------|
| <i>Agronomy Journal</i>                                                        | 43              | 1                 | 127             | 16                | 525                        | 24                           |
| <i>American Journal of Botany</i>                                              | 6               | 1                 | 48              | 7                 | 116                        | 8                            |
| <i>American Naturalist</i>                                                     | 5               | 1                 | 66              | 10                | 290                        | 18                           |
| <i>Annual Review of Ecology,<br/>Evolution, &amp; Systematics</i> <sup>1</sup> | 8               | 1                 | 9               | 3                 | 42                         | 3                            |
| <i>Biological Conservation</i>                                                 | 28              | 18                | 49              | 13                | 135                        | 24                           |
| <i>Biotropica</i>                                                              | 3               | 1                 | 48              | 19                | 181                        | 35                           |
| <i>Conservation Biology</i>                                                    | 26*             | 6*                | 70              | 17                | 219                        | 23                           |
| <i>Ecography</i> <sup>2</sup>                                                  | 5               | 1                 | 34              | 14                | 58                         | 16                           |
| <i>Ecology</i>                                                                 | 23              | 2                 | 130             | 13                | 423                        | 17                           |
| <i>Evolution</i>                                                               | 16              | 3                 | 63              | 11                | 417                        | 20                           |
| <i>Forest Ecology and Management</i>                                           | 27              | 12                | 51              | 16                | 170                        | 34                           |
| <i>Functional Ecology</i>                                                      | 22*             | 7*                | 63              | 16                | 137                        | 21                           |
| <i>Journal of Animal Ecology</i>                                               | 11              | 4                 | 65              | 14                | 135                        | 18                           |
| <i>Journal of Applied Ecology</i>                                              | 16              | 3                 | 58              | 15                | 146                        | 20                           |
| <i>Journal of Biogeography</i>                                                 | 25              | 8                 | 54              | 19                | 123                        | 20                           |
| <i>Journal of Ecology</i>                                                      | 10              | 1                 | 68              | 18                | 145                        | 23                           |
| <i>Journal of Tropical Ecology</i>                                             | 11              | 9                 | 14              | 6                 | 36                         | 20                           |
| <i>Journal of Zoology</i>                                                      | 1               | 1                 | 29              | 11                | 81                         | 15                           |
| <i>Landscape Ecology</i>                                                       | 19*             | 10*               | 57              | 16                | 156                        | 25                           |
| <i>New Phytologist</i>                                                         | 10              | 1                 | 38              | 12                | 68                         | 13                           |
| <i>N. Am. J. of Fisheries Management</i>                                       | 16              | 2                 | 25              | 3                 | 252                        | 4                            |
| <i>Oecologia</i>                                                               | 24              | 8                 | 136             | 26                | 314                        | 30                           |
| <i>Oikos</i>                                                                   | 12              | 4                 | 60              | 19                | 122                        | 20                           |
| <i>Plant Ecology</i> <sup>3</sup>                                              | 18              | 12                | 47              | 15                | 174                        | 32                           |

<sup>1</sup>Named *Annual Review of Ecology & Systematics* through 2002. <sup>2</sup>Named *Holarctic Ecology* through 1991 <sup>3</sup>Named *Vegetatio* through 1996 <sup>4</sup>Values for 1987, the first year the journal was published

Fig S2. Cumulative Geographic Richness from 1985–2014 of the editors for N = 24 environmental biology journals and of the authors publishing in those journals during the same time period (N = 113,816 articles).

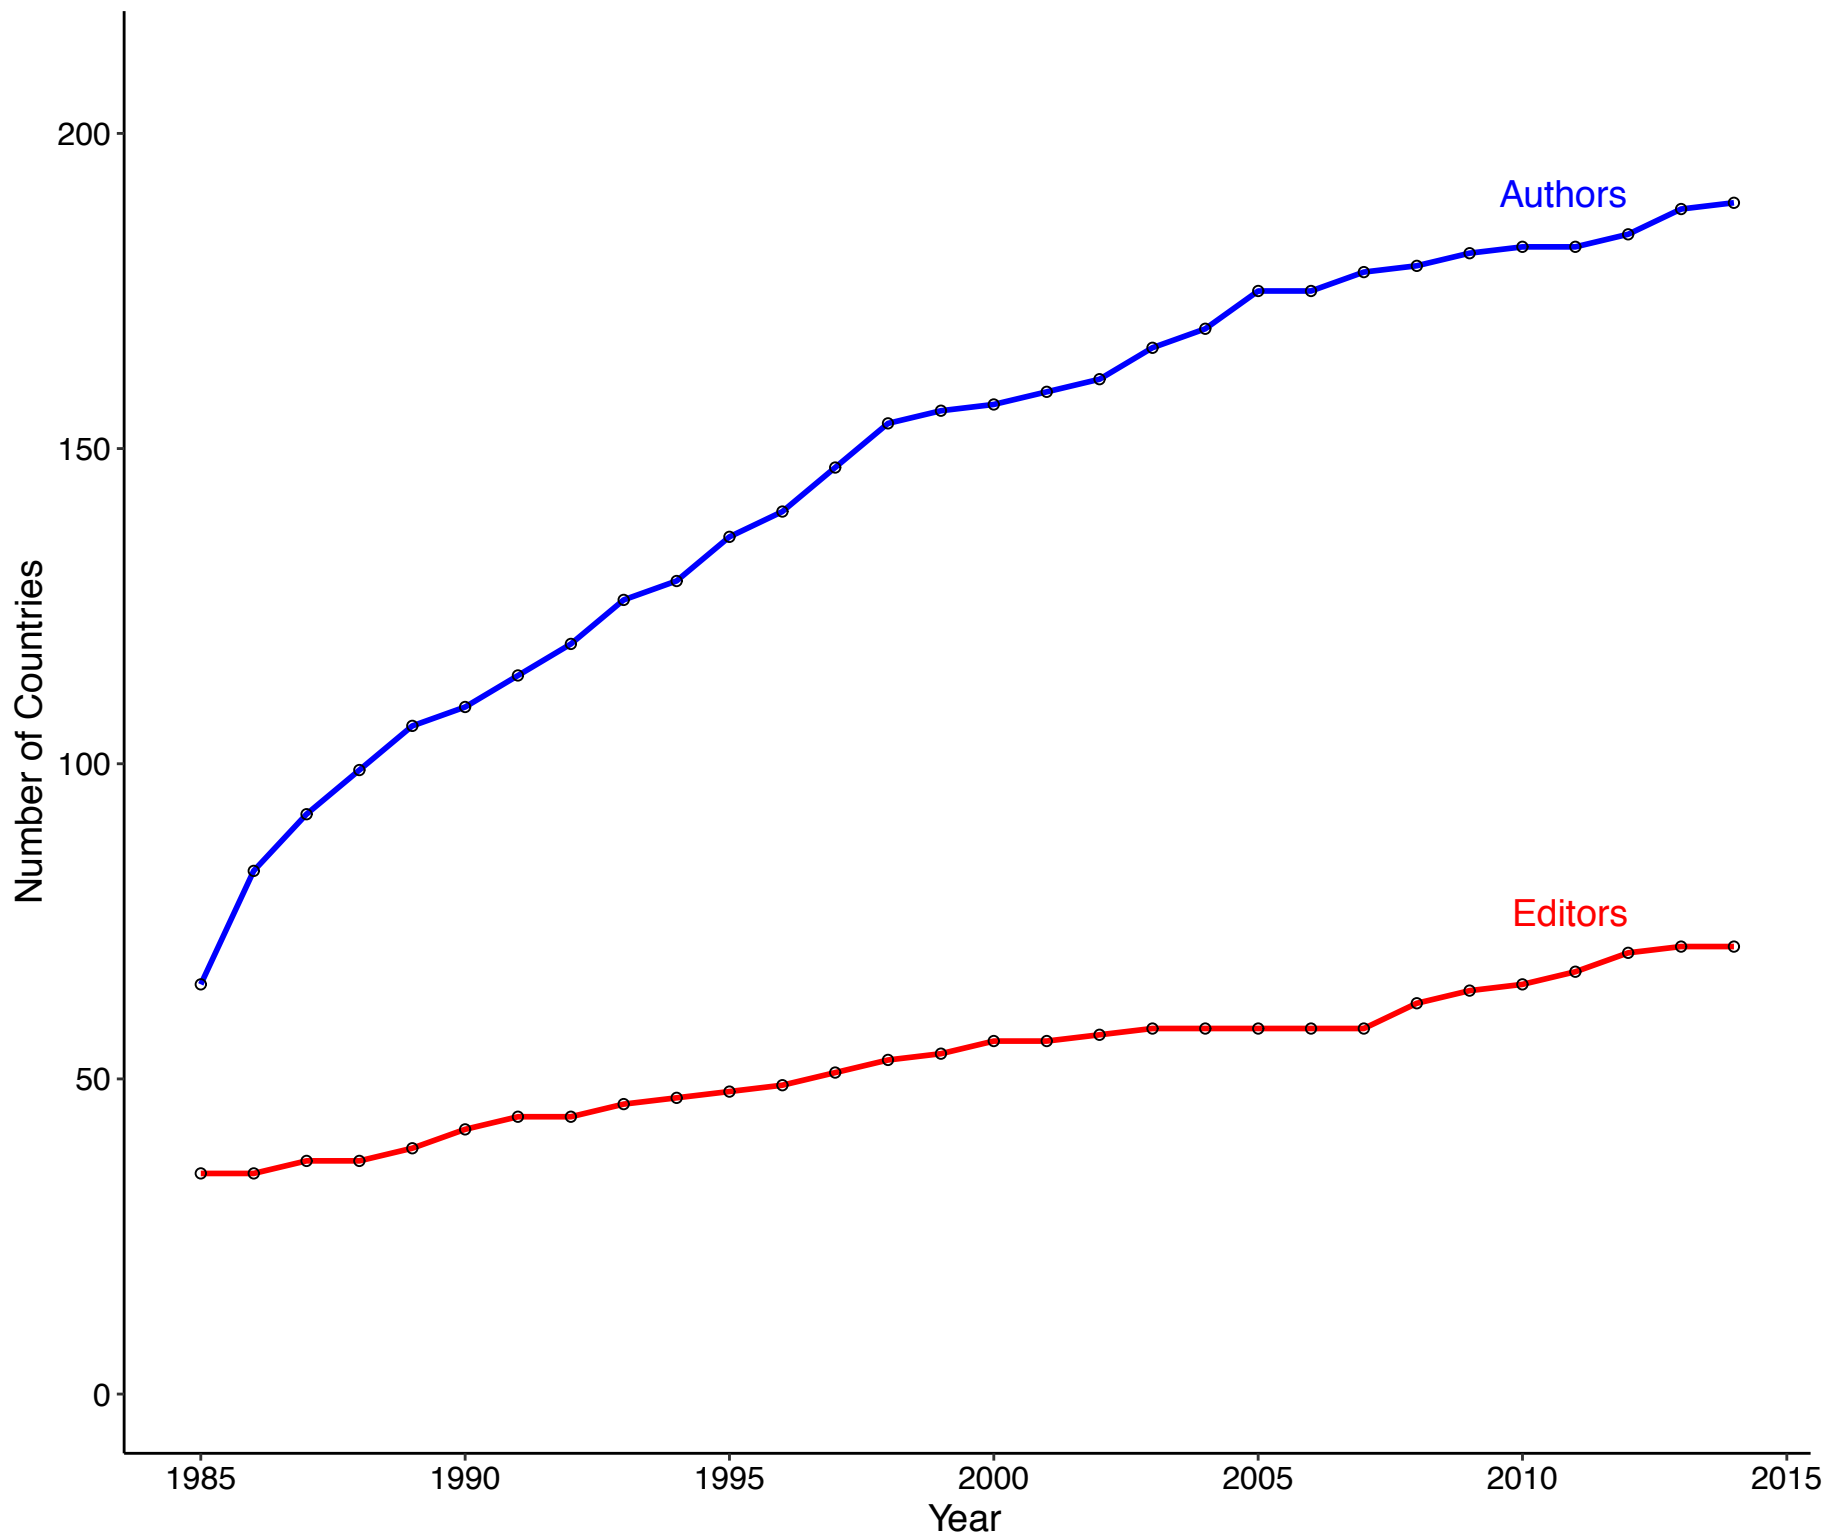

**APPENDIX A:** Geographic Richness, Diversity, and Evenness of N = 24 editorial boards from 1985-2014 (A-C) and the percentage of board members from different geographic regions and World Bank National Income classifications (D-E).

**(A)** Geographic Richness from 1985-2014 of N=24 editorial boards in environmental biology.

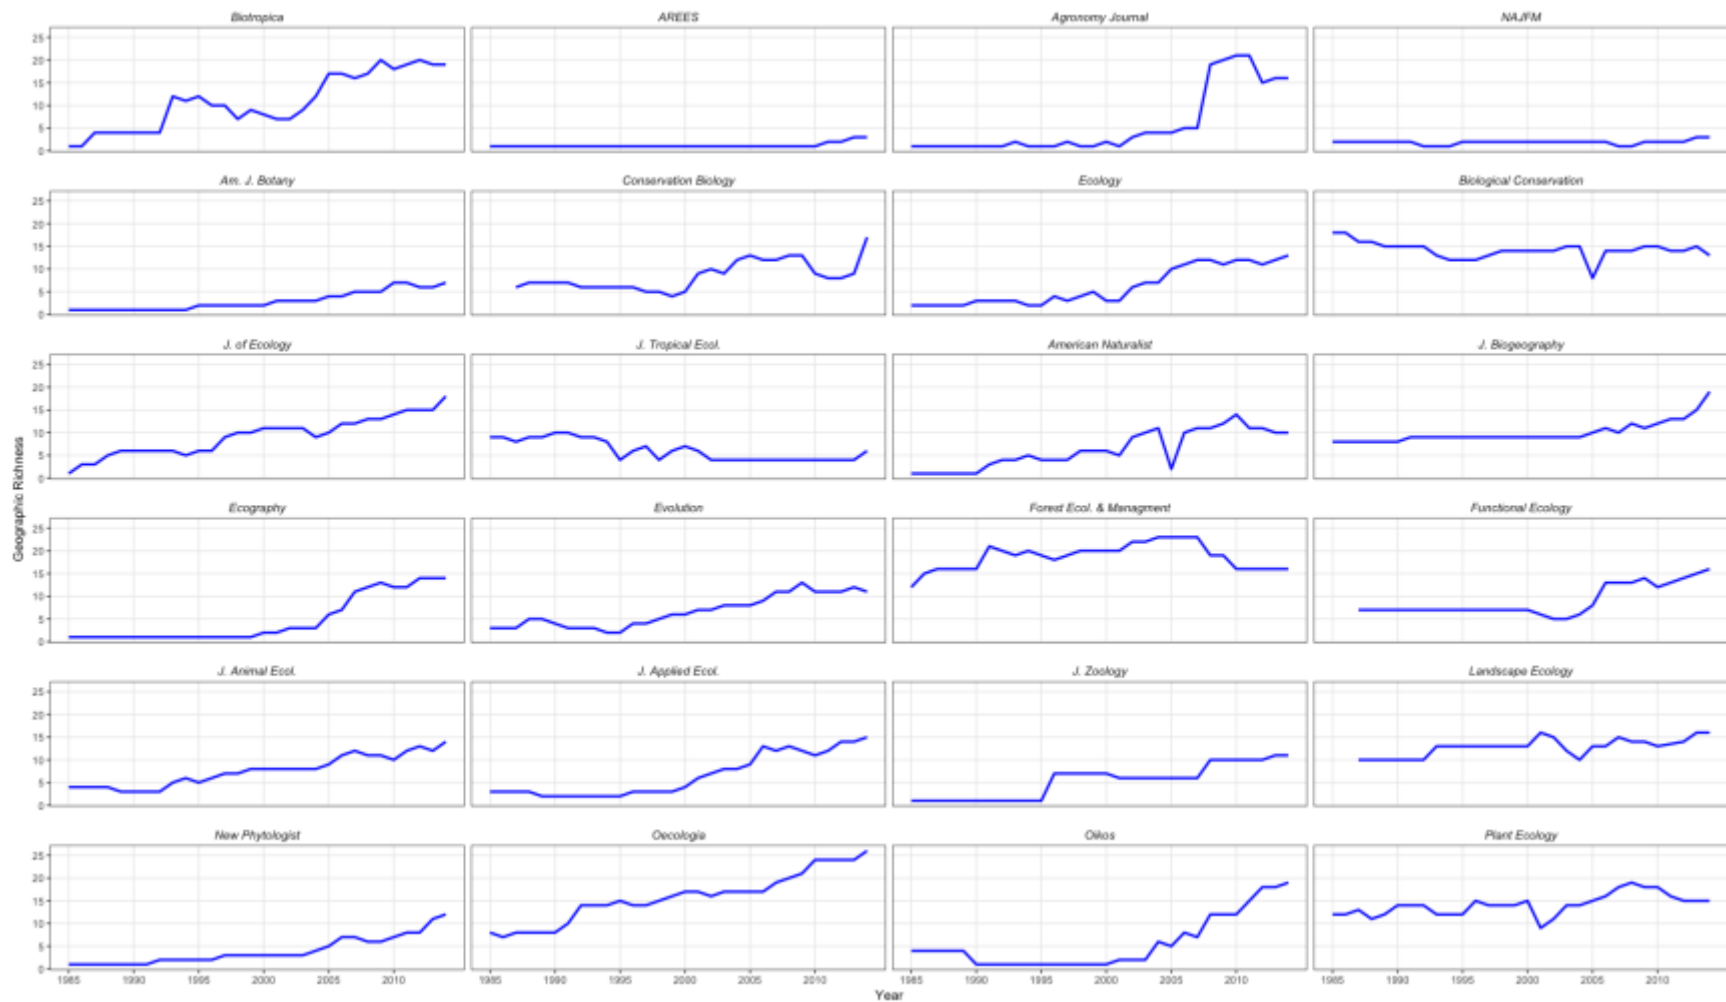

**(B)** Geographic Diversity from 1985-2014 of N=24 editorial boards in environmental biology.

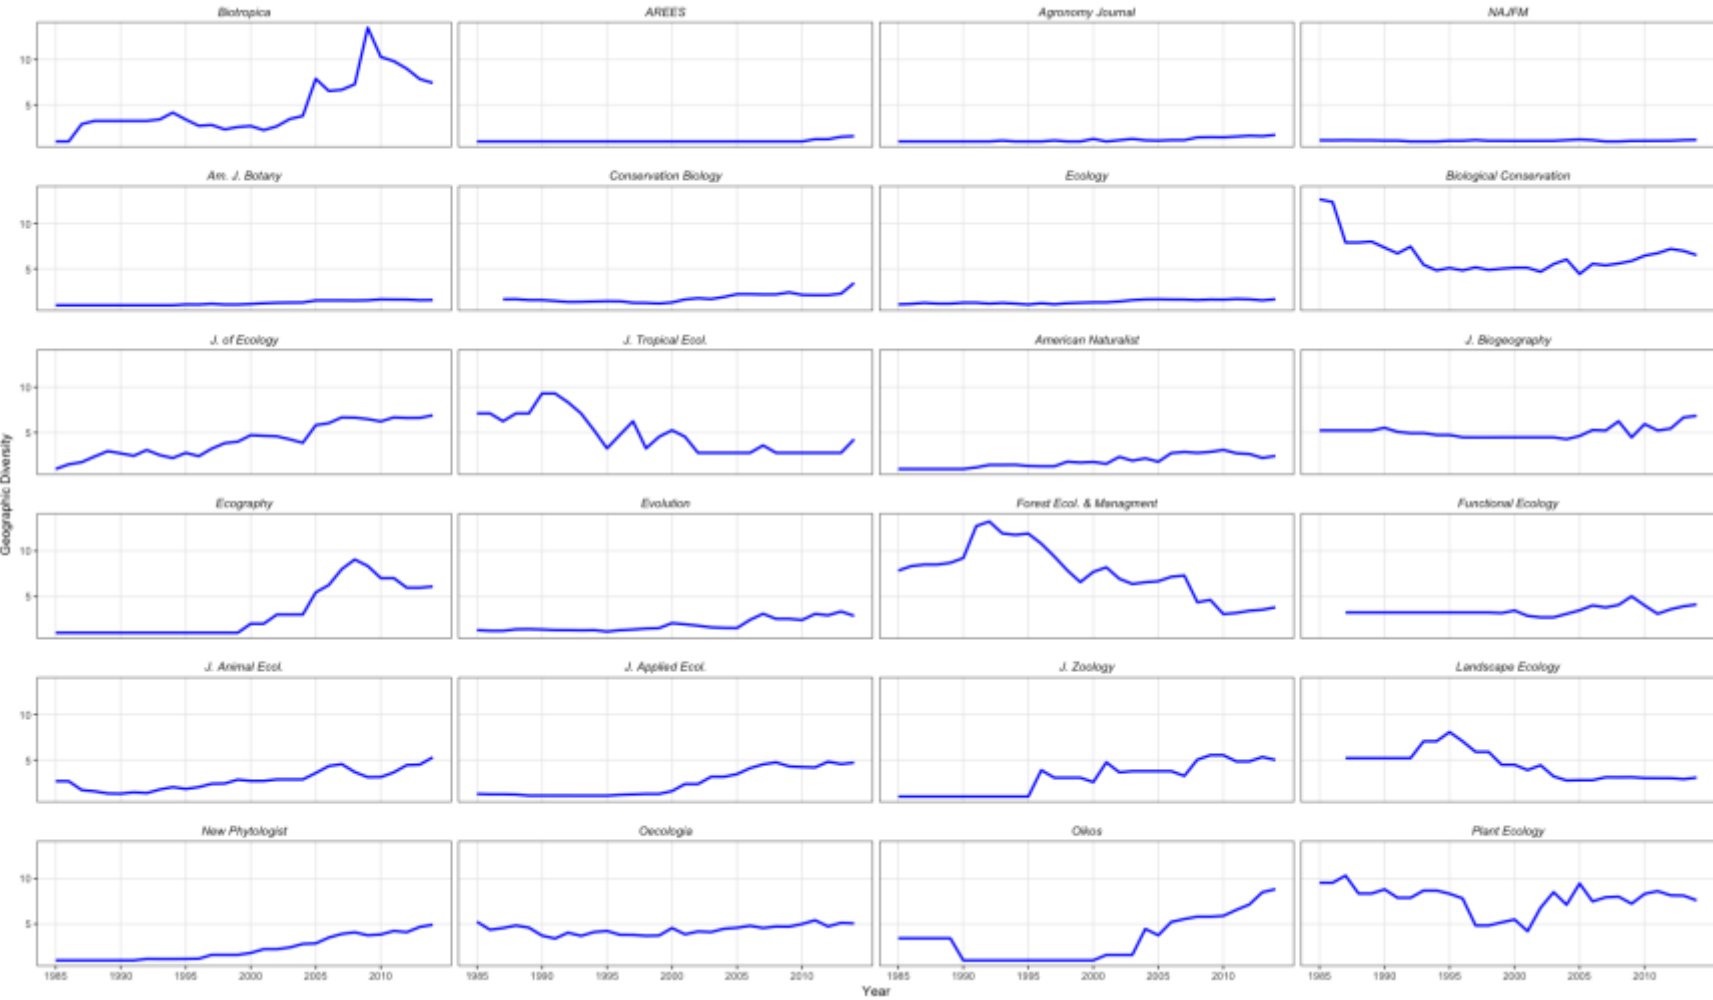

(C). Geographic Evenness from 1985-2014 of N=24 editorial boards in environmental biology.

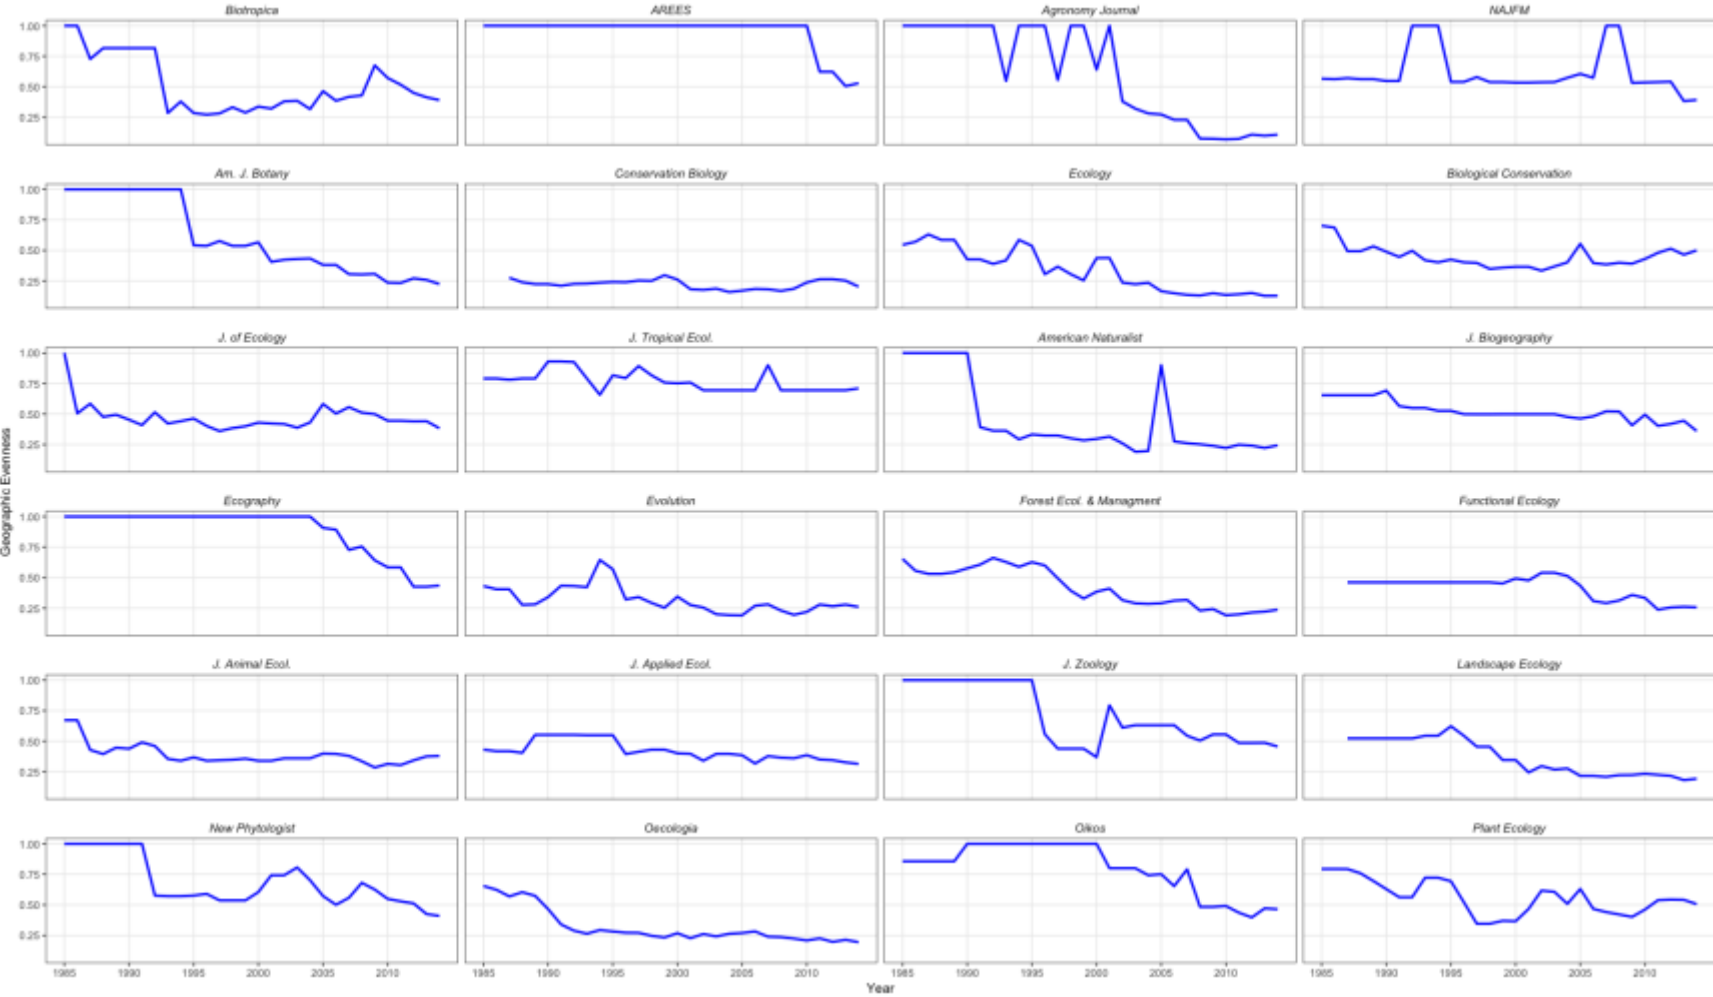

(D). Percentage of members of N=24 editorial boards based in different global regions (1985-2014).

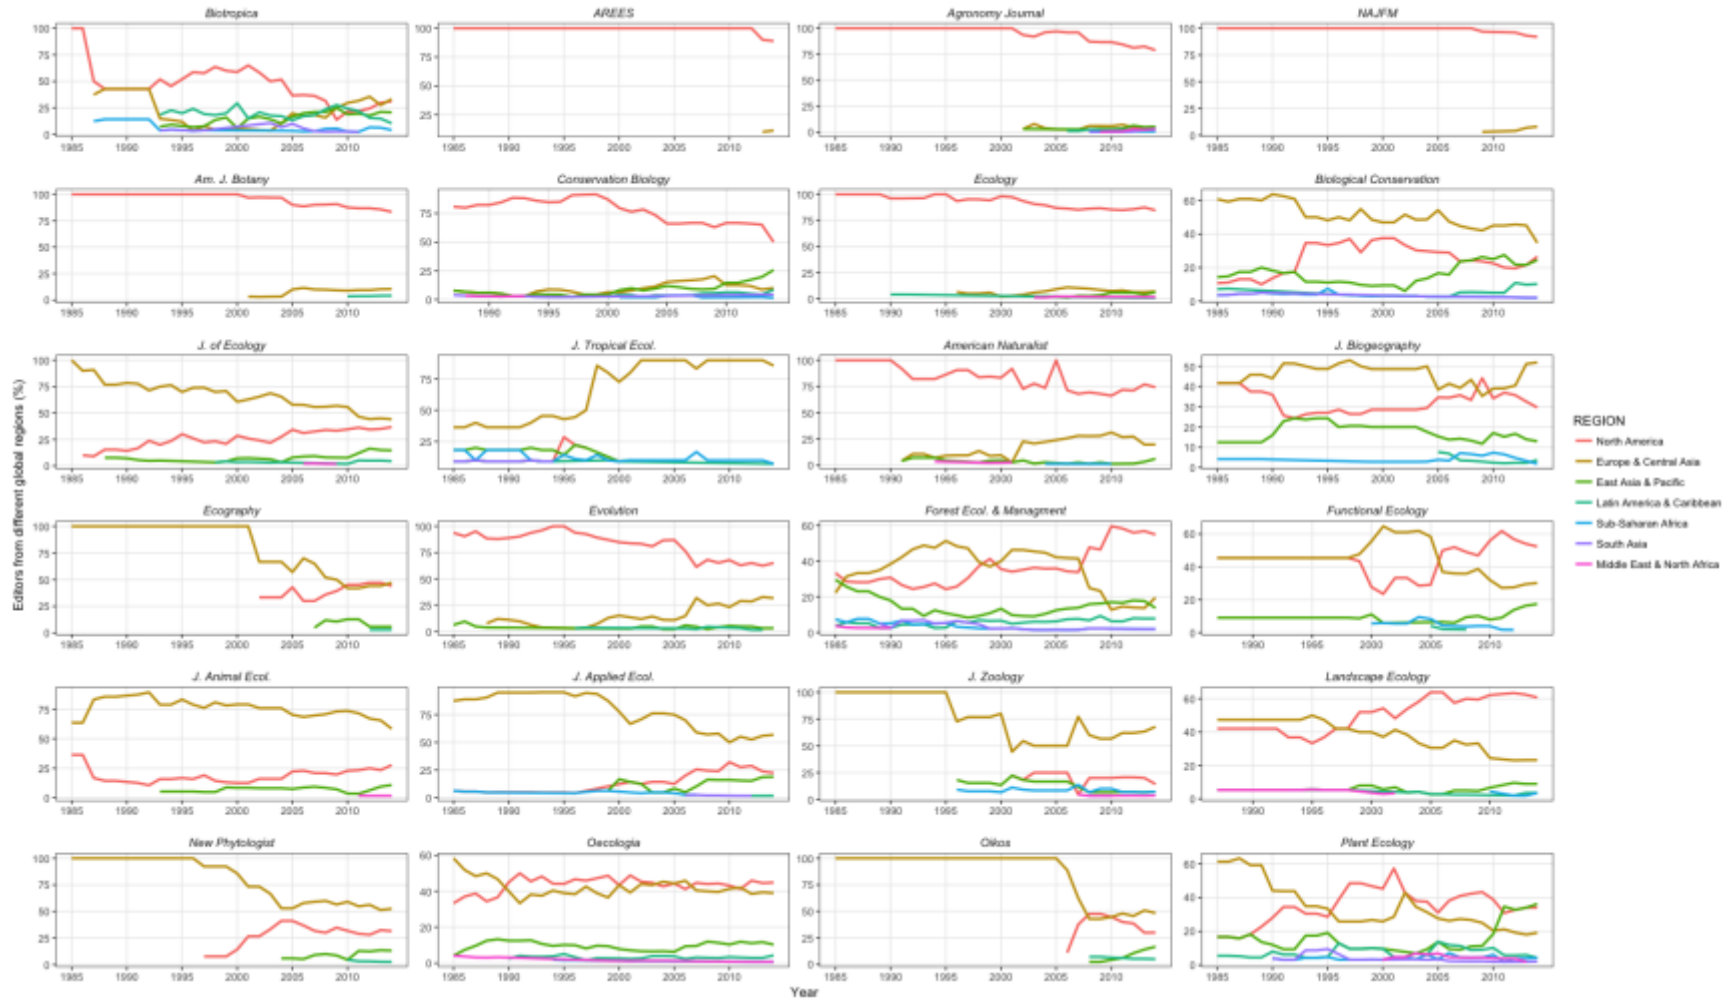

(E). Percentage of members of N=24 editorial boards based in each World Bank National Income category (1985-2014).

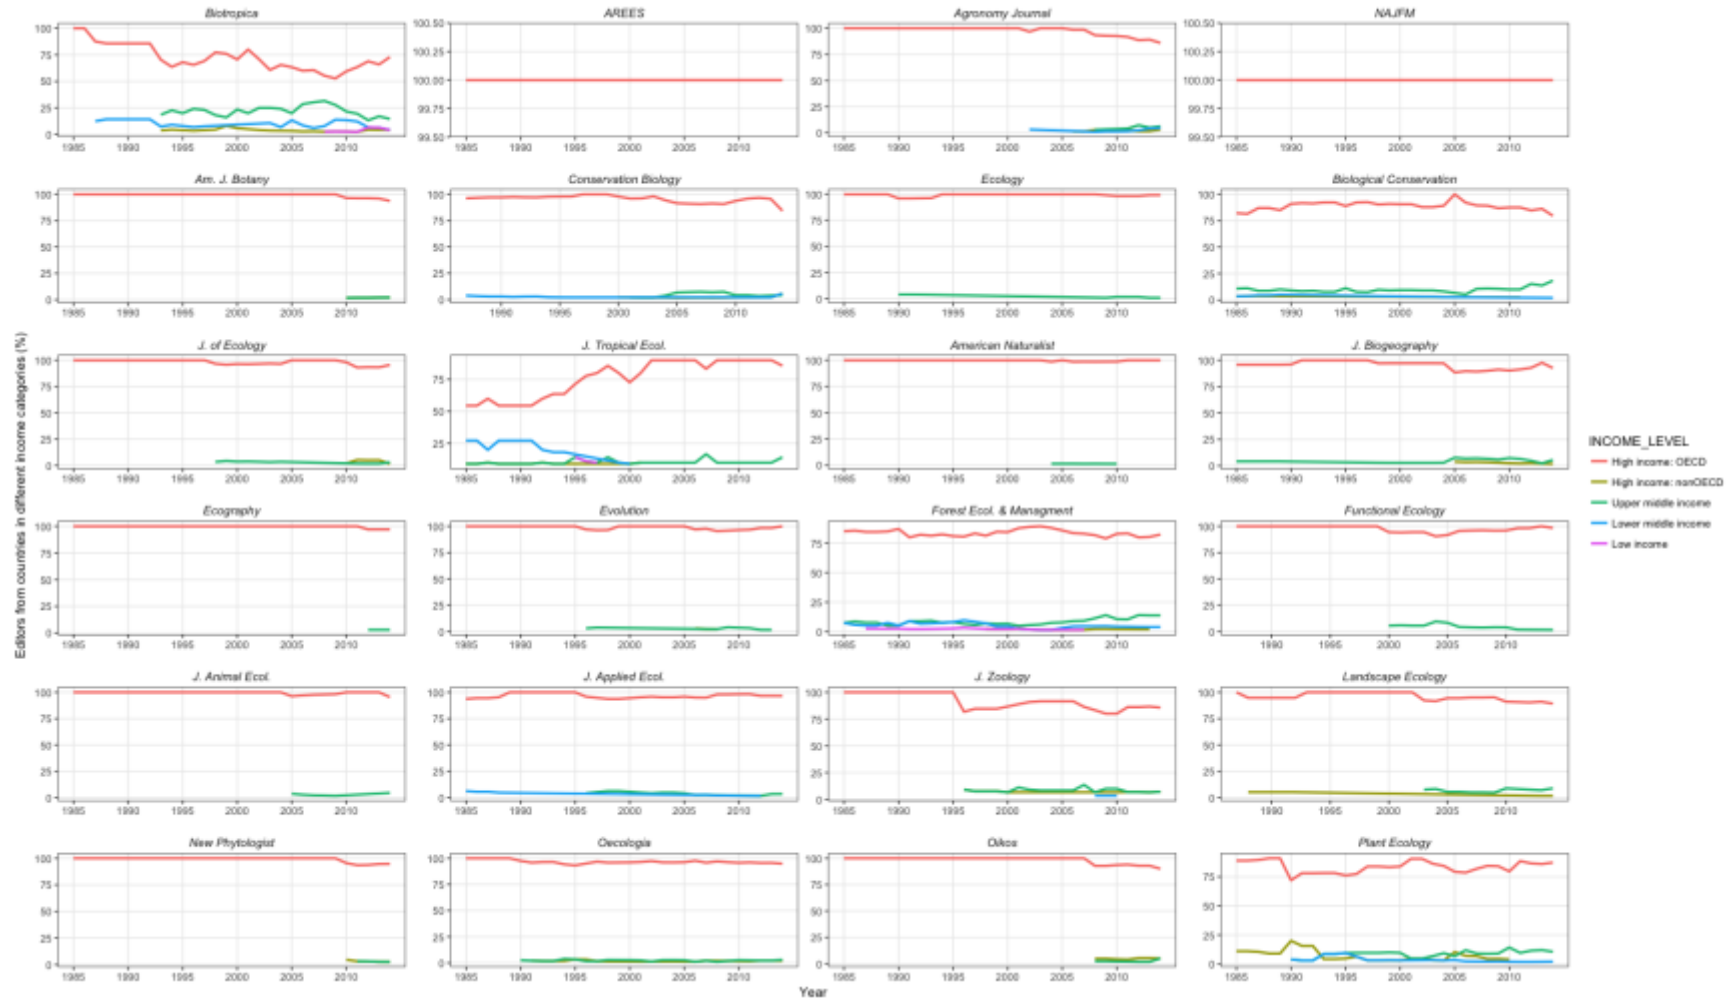

Source: http://www.biorxiv.org/content/10.1101/131292v1.full.pdf
